# Supplementary material
Source: HighWire-hosted journal article supplement (https://www.cmajopen.ca/highwire/filestream/84073/field_highwire_adjunct_files/1/2020-0048-2-at.pdf)
Supplement: 2020-0048-2-at.pdf [file 2020-0048-2-at.pdf]

**Supplemental Table S1. Rates of Major Amputation related to Diabetes or Peripheral Artery Disease**

| Region <sup>a</sup>      | Major Amputations related to Diabetes or Peripheral Artery Disease per 100,000 person-quarters <sup>a</sup><br>(95% Confidence Interval) <sup>b</sup> |
|--------------------------|-------------------------------------------------------------------------------------------------------------------------------------------------------|
| 6- MISSISSAUGA HALTON    | 2.53 (2.30-2.75)                                                                                                                                      |
| 8- CENTRAL               | 3.23 (3.02-3.44)                                                                                                                                      |
| 5- CENTRAL WEST          | 4.01 (3.67-4.35)                                                                                                                                      |
| 7- TORONTO CENTRAL       | 4.11 (3.81-4.42)                                                                                                                                      |
| 11- CHAMPLAIN            | 4.37 (4.08-4.66)                                                                                                                                      |
| 9- CENTRAL EAST          | 5.37 (5.07-5.67)                                                                                                                                      |
| 1- ERIE ST. CLAIR        | 5.40 (4.93-5.88)                                                                                                                                      |
| 3- WATERLOO WELLINGTON   | 5.70 (5.24-6.16)                                                                                                                                      |
| 12- NORTH SIMCOE MUSKOKA | 6.32 (5.72-6.92)                                                                                                                                      |
| 2- SOUTH WEST            | 6.58 (6.14-7.02)                                                                                                                                      |
| 10- SOUTH EAST           | 6.93 (6.33-7.53)                                                                                                                                      |
| 4- HAMILTON NIAGARA      | 7.20 (6.83-7.57)                                                                                                                                      |
| 13- NORTH-EAST           | 9.19 (8.55-9.83)                                                                                                                                      |
| 14- NORTH-WEST           | 11.77 (10.62-12.92)                                                                                                                                   |

<sup>a</sup> Rate reflects average over 2007-2017 study period and among residents  $\geq 40$  years old

<sup>b</sup> Ninety-five percent confidence intervals around the amputation rates were calculated assuming a negative binomial distribution accounting for recurrent events (i.e. repeat amputations in distinct quarters) over the study period (Glynn RJ, et al. Am J Epidemiol. 1993 Apr 1;137(7):776-86).

Supplemental Table S2. Major Amputee Cohort Characteristics by Region

| Region <sup>a</sup>      | No. of major amputees | Lowest income quintile<br>- N (%) | Rural residence<br>- N (%) | Comorbidity index <sup>b</sup><br>- Median<br>(interquartile range) | Death on index amputation admission<br>- N (%) |
|--------------------------|-----------------------|-----------------------------------|----------------------------|---------------------------------------------------------------------|------------------------------------------------|
| 6- MISSISSAUGA HALTON    | 448                   | 77 (17.2%)                        | <=5 (<=1.1%)               | 13 (6-24)                                                           | 53 (11.8%)                                     |
| 8- CENTRAL               | 884                   | 219 (24.8%)                       | 11 (1.2%)                  | 12 (6-21)                                                           | 118 (13.3%)                                    |
| 5- CENTRAL WEST          | 471                   | 97 (20.6%)                        | 19 (4.0%)                  | 13 (5-21)                                                           | 63 (13.4%)                                     |
| 7- TORONTO CENTRAL       | 785                   | 269 (34.9%)                       | 0 (0.0%)                   | 14 (6-23)                                                           | 82 (10.4%)                                     |
| 11- CHAMPLAIN            | 925                   | 232 (25.3%)                       | 183 (19.8%)                | 13 (5-21)                                                           | 116 (12.5%)                                    |
| 9- CENTRAL EAST          | 1,424                 | 438 (30.8%)                       | 120 (8.4%)                 | 13 (4-21)                                                           | 166 (11.7%)                                    |
| 1- ERIE ST. CLAIR        | 597                   | 172 (29.3%)                       | 77 (12.9%)                 | 11 (4-18)                                                           | 65 (10.9%)                                     |
| 3- WATERLOO WELLINGTON   | 642                   | 165 (25.7%)                       | 75 (11.7%)                 | 12 (4-20)                                                           | 63 (9.8%)                                      |
| 12- NORTH SIMCOE MUSKOKA | 510                   | 118 (23.4%)                       | 198 (38.9%)                | 12 (3-22)                                                           | 48 (9.4%)                                      |
| 2- SOUTH WEST            | 1,075                 | 295 (28.0%)                       | 374 (34.8%)                | 13 (4-22)                                                           | 107 (10.0%)                                    |
| 10- SOUTH EAST           | 641                   | 205 (32.2%)                       | 277 (43.2%)                | 12 (4-21)                                                           | 60 (9.4%)                                      |
| 4- HAMILTON NIAGARA      | 1,794                 | 567 (32.0%)                       | 103 (5.7%)                 | 12 (5-20)                                                           | 200 (11.1%)                                    |
| 13- NORTH-EAST           | 988                   | 323 (33.9%)                       | 390 (39.5%)                | 11 (3-19)                                                           | 120 (12.1%)                                    |
| 14- NORTH-WEST           | 474                   | 160 (34.3%)                       | 192 (40.5%)                | 11 (3-18)                                                           | 55 (11.6%)                                     |

<sup>a</sup> Regions are ordered from lowest to highest major amputation rate

<sup>b</sup> Aggregated Diagnosis Group Comorbidity Index

**Supplemental Table S3. Regional provider counts, per 100,000 residents at least 40 years old, in 2013**

| Region <sup>a</sup>      | Vascular Surgeons | Orthopedic Surgeons | General Surgeons | Vascular, Orthopedic or General Surgeons | Podiatrists-Chiropractors |
|--------------------------|-------------------|---------------------|------------------|------------------------------------------|---------------------------|
| 6- MISSISSAUGA HALTON    | 0.70              | 5.61                | 9.63             | 15.94                                    | 20.49                     |
| 8- CENTRAL               | 0.56              | 8.31                | 11.90            | 20.77                                    | 14.82                     |
| 5- CENTRAL WEST          | 0.00              | 5.78                | 8.29             | 14.07                                    | 18.59                     |
| 7- TORONTO CENTRAL       | 1.86              | 15.02               | 16.54            | 33.42                                    | 36.63                     |
| 11- CHAMPLAIN            | 1.23              | 10.89               | 14.27            | 26.39                                    | 3.68                      |
| 9- CENTRAL EAST          | 0.50              | 7.77                | 9.39             | 17.66                                    | 14.40                     |
| 1- ERIE ST. CLAIR        | 0.30              | 6.53                | 12.17            | 18.99                                    | 12.76                     |
| 3- WATERLOO WELLINGTON   | 0.83              | 6.64                | 9.96             | 17.44                                    | 12.73                     |
| 12- NORTH SIMCOE MUSKOKA | 0.40              | 5.53                | 11.46            | 17.38                                    | 14.22                     |
| 2- SOUTH WEST            | 0.80              | 12.44               | 14.25            | 27.49                                    | 9.63                      |
| 10- SOUTH EAST           | 0.72              | 12.56               | 9.69             | 22.97                                    | 25.12                     |
| 4- HAMILTON NIAGARA      | 0.93              | 9.21                | 13.75            | 23.89                                    | 14.15                     |
| 13- NORTH-EAST           | 0.00              | 8.50                | 14.80            | 23.30                                    | 11.02                     |
| 14- NORTH-WEST           | 0.00              | 9.73                | 15.40            | 25.13                                    | 7.30                      |

<sup>a</sup> Regions are ordered from lowest to highest major amputation rate

**Supplemental Table S4. Physician and Publicly-Funded Podiatry Visits within 30-365 days prior to Index Amputation Admission**

| Region <sup>a</sup>      | No. of Amputees | GP <sup>b</sup>          | Vascular Surgeon | Orthopedic Surgeon | General Surgeon | Vascular, Orthopedic or General Surgeon | Other Specialist Physician | Publicly-Funded Podiatry <sup>c</sup> |
|--------------------------|-----------------|--------------------------|------------------|--------------------|-----------------|-----------------------------------------|----------------------------|---------------------------------------|
|                          |                 | At least 1 Visit - N (%) |                  |                    |                 |                                         |                            |                                       |
| 6- MISSISSAUGA HALTON    | 448             | 418<br>(93.3%)           | 258<br>(57.6%)   | 103<br>(23.0%)     | 79<br>(17.6%)   | 328<br>(73.2%)                          | 419<br>(93.5%)             | 6<br>(1.3%)                           |
| 8- CENTRAL               | 884             | 843<br>(95.4%)           | 451<br>(51.0%)   | 222<br>(25.1%)     | 231<br>(26.1%)  | 630<br>(71.3%)                          | 833<br>(94.2%)             | 74<br>(8.4%)                          |
| 5- CENTRAL WEST          | 471             | 440<br>(93.4%)           | 204<br>(43.3%)   | 102<br>(21.7%)     | 187<br>(39.7%)  | 325<br>(69.0%)                          | 437<br>(92.8%)             | 15<br>(3.2%)                          |
| 7- TORONTO CENTRAL       | 785             | 710<br>(90.4%)           | 445<br>(56.7%)   | 182<br>(23.2%)     | 79<br>(10.1%)   | 539<br>(68.7%)                          | 726<br>(92.5%)             | 52<br>(6.6%)                          |
| 11- CHAMPLAIN            | 925             | 868<br>(93.8%)           | 456<br>(49.3%)   | 178<br>(19.2%)     | 209<br>(22.6%)  | 621<br>(67.1%)                          | 853<br>(92.2%)             | 7<br>(0.8%)                           |
| 9- CENTRAL EAST          | 1,424           | 1,365<br>(95.9%)         | 775<br>(54.4%)   | 280<br>(19.7%)     | 221<br>(15.5%)  | 965<br>(67.8%)                          | 1,320<br>(92.7%)           | 49<br>(3.4%)                          |
| 1- ERIE ST. CLAIR        | 597             | 557<br>(93.3%)           | 267<br>(44.7%)   | 133<br>(22.3%)     | 163<br>(27.3%)  | 416<br>(69.7%)                          | 556<br>(93.1%)             | 9<br>(1.5%)                           |
| 3- WATERLOO WELLINGTON   | 642             | 623<br>(97.0%)           | 325<br>(50.6%)   | 161<br>(25.1%)     | 158<br>(24.6%)  | 448<br>(69.8%)                          | 610<br>(95.0%)             | 44<br>(6.9%)                          |
| 12- NORTH SIMCOE MUSKOKA | 510             | 495<br>(97.1%)           | 148<br>(29.0%)   | 145<br>(28.4%)     | 170<br>(33.3%)  | 330<br>(64.7%)                          | 484<br>(94.9%)             | 8<br>(1.6%)                           |
| 2- SOUTH WEST            | 1,075           | 1,022<br>(95.1%)         | 426<br>(39.6%)   | 197<br>(18.3%)     | 335<br>(31.2%)  | 722<br>(67.2%)                          | 1,003<br>(93.3%)           | 17<br>(1.6%)                          |
| 10- SOUTH EAST           | 641             | 591<br>(92.2%)           | 267<br>(41.7%)   | 164<br>(25.6%)     | 100<br>(15.6%)  | 402<br>(62.7%)                          | 583<br>(91.0%)             | 10<br>(1.6%)                          |
| 4- HAMILTON NIAGARA      | 1,794           | 1,703<br>(94.9%)         | 792<br>(44.1%)   | 595<br>(33.2%)     | 511<br>(28.5%)  | 1,255<br>(70.0%)                        | 1,687<br>(94.0%)           | 61<br>(3.4%)                          |
| 13- NORTH-EAST           | 988             | 949<br>(96.1%)           | 581<br>(58.8%)   | 162<br>(16.4%)     | 426<br>(43.1%)  | 809<br>(81.9%)                          | 935<br>(94.6%)             | 21<br>(2.1%)                          |
| 14- NORTH-WEST           | 474             | 437<br>(92.2%)           | 26<br>(5.5%)     | 141<br>(29.7%)     | 180<br>(38.0%)  | 272<br>(57.4%)                          | 452<br>(95.4%)             | 0<br>(0.0%)                           |

<sup>a</sup> Regions are ordered from lowest to highest major amputation rate

<sup>b</sup> General Practitioner

<sup>c</sup> The majority of podiatry and chiropody services are not publicly funded in Ontario

Supplemental Table S5. Health Services within 365 Days Prior to Index Amputation Admission

| Region <sup>a</sup>      | No. of Amputees | At least one Hospitalization | At least one ED <sup>b</sup> visit | Home care nursing | Revascularization - N (%) |                |                      | Minor <sup>c</sup> Amputation | Total Health Care Costs <sup>d</sup> |
|--------------------------|-----------------|------------------------------|------------------------------------|-------------------|---------------------------|----------------|----------------------|-------------------------------|--------------------------------------|
|                          |                 | - N (%)                      | - N (%)                            | - N (%)           | Open surgery              | Endovascular   | Open or endovascular | - N (%)                       | - Mean                               |
| 6- MISSISSAUGA HALTON    | 448             | 317<br>(70.8%)               | 378<br>(84.4%)                     | 310<br>(69.2%)    | 82<br>(18.3%)             | 73<br>(16.3%)  | 123<br>(27.5%)       | 44<br>(9.8%)                  | \$66,711                             |
| 8- CENTRAL               | 884             | 619<br>(70.0%)               | 763<br>(86.3%)                     | 631<br>(71.4%)    | 134<br>(15.2%)            | 119<br>(13.5%) | 213<br>(24.1%)       | 91<br>(10.3%)                 | \$64,186                             |
| 5- CENTRAL WEST          | 471             | 321<br>(68.2%)               | 398<br>(84.5%)                     | 303<br>(64.3%)    | 58<br>(12.3%)             | 87<br>(18.5%)  | 113<br>(24.0%)       | 49<br>(10.4%)                 | \$64,183                             |
| 7- TORONTO CENTRAL       | 785             | 521<br>(66.4%)               | 685<br>(87.3%)                     | 532<br>(67.8%)    | 80<br>(10.2%)             | 118<br>(15.0%) | 169<br>(21.5%)       | 64<br>(8.2%)                  | \$69,483                             |
| 11- CHAMPLAIN            | 925             | 574<br>(62.1%)               | 793<br>(85.7%)                     | 579<br>(62.6%)    | 102<br>(11.0%)            | 157<br>(17.0%) | 209<br>(22.6%)       | 112<br>(12.1%)                | \$69,310                             |
| 9- CENTRAL EAST          | 1,424           | 866<br>(60.8%)               | 1,243<br>(87.3%)                   | 980<br>(68.8%)    | 150<br>(10.5%)            | 116<br>(8.1%)  | 229<br>(16.1%)       | 167<br>(11.7%)                | \$54,251                             |
| 1- ERIE ST. CLAIR        | 597             | 398<br>(66.7%)               | 514<br>(86.1%)                     | 475<br>(79.6%)    | 89<br>(14.9%)             | 46<br>(7.7%)   | 116<br>(19.4%)       | 122<br>(20.4%)                | \$68,481                             |
| 3- WATERLOO WELLINGTON   | 642             | 425<br>(66.2%)               | 537<br>(83.6%)                     | 471<br>(73.4%)    | 88<br>(13.7%)             | 106<br>(16.5%) | 157<br>(24.5%)       | 80<br>(12.5%)                 | \$53,128                             |
| 12- NORTH SIMCOE MUSKOKA | 510             | 340<br>(66.7%)               | 465<br>(91.2%)                     | 392<br>(76.9%)    | 90<br>(17.6%)             | 41<br>(8.0%)   | 113<br>(22.2%)       | 61<br>(12.0%)                 | \$51,334                             |
| 2- SOUTH WEST            | 1,075           | 724<br>(67.3%)               | 919<br>(85.5%)                     | 800<br>(74.4%)    | 137<br>(12.7%)            | 80<br>(7.4%)   | 179<br>(16.7%)       | 194<br>(18.0%)                | \$56,587                             |
| 10- SOUTH EAST           | 641             | 373<br>(58.2%)               | 539<br>(84.1%)                     | 427<br>(66.6%)    | 53<br>(8.3%)              | 46<br>(7.2%)   | 90<br>(14.0%)        | 98<br>(15.3%)                 | \$45,103                             |
| 4- HAMILTON NIAGARA      | 1,794           | 1,196<br>(66.7%)             | 1,550<br>(86.4%)                   | 1,326<br>(73.9%)  | 349<br>(19.5%)            | 179<br>(10.0%) | 437<br>(24.4%)       | 165<br>(9.2%)                 | \$56,510                             |
| 13- NORTH-EAST           | 988             | 683<br>(69.1%)               | 856<br>(86.6%)                     | 645<br>(65.3%)    | 110<br>(11.1%)            | 33<br>(3.3%)   | 127<br>(12.9%)       | 201<br>(20.3%)                | \$57,686                             |
| 14- NORTH-WEST           | 474             | 319<br>(67.3%)               | 430<br>(90.7%)                     | 231<br>(48.7%)    | 21<br>(4.4%)              | 13<br>(2.7%)   | 27<br>(5.7%)         | 52<br>(11.0%)                 | \$62,213                             |

<sup>a</sup> Regions are ordered from lowest to highest major amputation rate

<sup>b</sup> ED – Emergency Department

<sup>c</sup> Minor amputation – below ankle

<sup>d</sup> Costs in 2017 Canadian dollars from the perspective of Ontario Ministry of Health & Long Term Care

**Supplemental Table S6. Revascularization on Index Hospitalization**

| Region <sup>a</sup>      | No. of amputees | Revascularization – N (%) |              |                      |
|--------------------------|-----------------|---------------------------|--------------|----------------------|
|                          |                 | Open surgery              | Endovascular | Open or endovascular |
| 6- MISSISSAUGA HALTON    | 448             | 55 (12.3%)                | 60 (13.4%)   | 94 (21.0%)           |
| 8- CENTRAL               | 884             | 61 (6.9%)                 | 80 (9.0%)    | 129 (14.6%)          |
| 5- CENTRAL WEST          | 471             | 56 (11.9%)                | 43 (9.1%)    | 88 (18.7%)           |
| 7- TORONTO CENTRAL       | 785             | 57 (7.3%)                 | 46 (5.9%)    | 88 (11.2%)           |
| 11- CHAMPLAIN            | 925             | 127 (13.7%)               | 87 (9.4%)    | 189 (20.4%)          |
| 9- CENTRAL EAST          | 1,424           | 78 (5.5%)                 | 92 (6.5%)    | 150 (10.5%)          |
| 1- ERIE ST. CLAIR        | 597             | 26 (4.4%)                 | 54 (9.0%)    | 72 (12.1%)           |
| 3- WATERLOO WELLINGTON   | 642             | 38 (5.9%)                 | 54 (8.4%)    | 78 (12.1%)           |
| 12- NORTH SIMCOE MUSKOKA | 510             | 32 (6.3%)                 | 38 (7.5%)    | 62 (12.2%)           |
| 2- SOUTH WEST            | 1,075           | 33 (3.1%)                 | 77 (7.2%)    | 96 (8.9%)            |
| 10- SOUTH EAST           | 641             | 39 (6.1%)                 | 37 (5.8%)    | 68 (10.6%)           |
| 4- HAMILTON NIAGARA      | 1,794           | 84 (4.7%)                 | 211 (11.8%)  | 254 (14.2%)          |
| 13- NORTH-EAST           | 988             | 18 (1.8%)                 | 62 (6.3%)    | 77 (7.8%)            |
| 14- NORTH-WEST           | 474             | 12 (2.5%)                 | 14 (3.0%)    | 20 (4.2%)            |

<sup>a</sup> Regions are ordered from lowest to highest major amputation rate
